# Supplementary material for: Transcriptome analysis of resistant and susceptible M. truncatula genotypes in response to the necrotrophic fungus A. medicaginicola
Source: Research Square preprint supplement (doi:10.21203/rs.3.rs-4426199/v1), 2024-06-07
Supplement: Supplementary file 1 [file 58cb2bb4e04d4387af02d672.xlsx]

## Sheet: Sheet1
Table 4. Differentially expressed genes in SA and JA pathways for the resistant and susceptible genotype.
Hormone pathway	Comparison	Genes	Gene abbreviation	Function	log2FC
SA biosynthesis and signaling	Resistant inoculated vs mock 72 hpi	MtrunA17_Chr7g0256321	MtNOOT1	NODULE ROOT 1	2.91409
	Susceptible inoculated vs mock 72 hpi	MtrunA17_Chr2g0295051	MtPR10-3	Pathogenesis-related protein 10	8.25022
	Susceptible inoculated vs mock 72 hpi	MtrunA17_Chr2g0295064	MtPR10-6	Pathogenesis-related protein 10	6.974
	Susceptible inoculated vs mock 72 hpi	MtrunA17_Chr1g0190651	MtPR4	pathogenesis-related protein 4	6.20783
	Susceptible inoculated vs mock 72 hpi	MtrunA17_Chr1g0181091	MtPAL	Phenylalanine Ammonia Lyase	6.09
	Susceptible inoculated vs mock 72 hpi	MtrunA17_Chr5g0404511	MtIFR	Isoflavone reductase	5.67
	Susceptible inoculated vs mock 72 hpi	MtrunA17_Chr2g0295371	AtPR-1-like	pathogenesis-related protein 1	3.79523
	Susceptible inoculated vs mock 72 hpi	MtrunA17_Chr4g0067951	MtPR10-5	Pathogenesis-related protein 10	3.38889
	Susceptible inoculated vs mock 72 hpi	MtrunA17_Chr2g0295021	MtPR10-2	Pathogenesis-related protein 10	3.33872
	Susceptible inoculated vs mock 72 hpi	MtrunA17_Chr2g0295141	MtPR10-4	Pathogenesis-related protein 10	1.349
	Susceptible inoculated vs mock 72 hpi	MtrunA17_Chr2g0295001	MtPR10-1	Pathogenesis-related protein 10-1	1.06689
	Susceptible inoculated vs mock 72 hpi	MtrunA17_Chr5g0397821	MtPR5	pathogenesis-related protein 5	1.03039
	Susceptible inoculated vs mock 72 hpi	MtrunA17_Chr1g0171771	MtNOOT2	NODULE ROOT 2	-1.20716
JA biosynthesis and signaling	Resistant inoculated vs mock 24 hpi	MtrunA17_Chr7g0272791	MtLOX1-5	Putative linoleate 9S-lipoxygenase	1.72087
	Resistant inoculated vs mock 48 hpi	MtrunA17_Chr7g0272791	MtLOX1-5	Putative linoleate 9S-lipoxygenase	1.18645
	Resistant inoculated vs mock 72 hpi	MtrunA17_Chr7g0272791	MtLOX1-5	Putative linoleate 9S-lipoxygenase	1.08645
	Susceptible inoculated vs mock 72 hpi	MtrunA17_Chr3g0141271	MtAOS2	allene oxide synthase 2	4.37311
	Susceptible inoculated vs mock 72 hpi	MtrunA17_Chr5g0394861	MtOPR	12-OPDA reductase (TC94406)	2.99149
	Susceptible inoculated vs mock 72 hpi	MtrunA17_Chr1g0154381	MtAOS1	allene oxide synthase 1	2.41616
	Susceptible inoculated vs mock 72 hpi	MtrunA17_Chr8g0344201	MtLOX6	lipoxygenase (TC97760)	1.7868
	Susceptible inoculated vs mock 72 hpi	MtrunA17_Chr4g0070561	MtOPR3	oxophytodienoate-reductase 3	-1.25186
	Susceptible inoculated vs mock 72 hpi	MtrunA17_Chr4g0033171	MtLOX1	lipoxygenase (TC100514)	-3.61586
