# Supplementary material for: Transcriptome analysis of resistant and susceptible M. truncatula genotypes in response to the necrotrophic fungus A. medicaginicola
Source: Research Square preprint supplement (doi:10.21203/rs.3.rs-4426199/v1), 2024-06-07
Supplement: Supplementary file 2 [file 7f0f68ec9f5a64b84fd6bb29.xlsx]

## Sheet: Sheet1
Table 5. Differentially expressed RLKs in the resistant genotype.
Time point (hpi)	Gene ID	RLK class	log2FC	Unique to HM078
72	MtrunA17_Chr5g0436941	RLK-Pelle-LRR	4.62	Yes
48, 72	MtrunA17_Chr8g0361341	RLK-Pelle-DLSV	3.63, 3.23	Yes
72	MtrunA17_Chr1g0149711	RLK-Pelle-RLCK	3	Yes
72	MtrunA17_Chr4g0048711	RLK-Pelle-DLSV	2.5	No
72	MtrunA17_Chr1g0161701	RLK-Pelle-LRR	1.75	Yes
72	MtrunA17_Chr8g0358031	RLK-Pelle-DLSV	1.61	Yes
72	MtrunA17_Chr1g0160761	RLK-Pelle-LRK	1.56	Yes
72	MtrunA17_Chr1g0158251	RLK-Pelle-WAK	1.53	No
24	MtrunA17_Chr4g0071481	RLK-Pelle-RLCK	-2.22	No
