# Supplementary material for: Transcriptome analysis of resistant and susceptible M. truncatula genotypes in response to the necrotrophic fungus A. medicaginicola
Source: Research Square preprint supplement (doi:10.21203/rs.3.rs-4426199/v1), 2024-06-07
Supplement: Supplementary file 3 [file 81d180859d2238e112670d6e.xlsx]

## Sheet: Sheet1
Table 6. Differentially expressed NLR plant disease resistance genes in the resistant genotype.
Time point (hpi)	Gene ID	Blast2GO Description	NLR class	log2FC	Unique to HM078
72	MtrunA17_Chr8g0392521	disease resistance RPP13-like protein 1	CC-NBS	6.25435	Yes
72	MtrunA17_Chr6g0480181	TMV resistance protein N	TIR-NBS-LRR	3.57034	Yes
48	MtrunA17_Chr6g0471941	disease resistance protein RGA2	CC-NBS-LRR	-1.32188	Yes
72	MtrunA17_Chr3g0081391	disease resistance protein RPM1	CC-NBS-LRR	-4.23934	Yes
