# Supplementary material for: Transcriptome analysis of resistant and susceptible M. truncatula genotypes in response to the necrotrophic fungus A. medicaginicola
Source: Research Square preprint supplement (doi:10.21203/rs.3.rs-4426199/v1), 2024-06-07
Supplement: Supplementary file 4 [file b35a453ab2efa92bd05cb289.xlsx]

## Sheet: Sheet1
Table 1. The ten most upregulated and downregulated DEGs in the resistant genotype HM078.
Time point (hpi)	Gene ID	Gene abbreviation	Function	log2FC	Unique DEG in HM078
72	MtrunA17_Chr2g0323211	MtPBP1	Putative calcium-binding protein KIC/PBP1/KRP1	9.23	Yes
72	MtrunA17_Chr4g0035371	N/A	Putative MATH domain-containing protein	8.89	Yes
72	MtrunA17_Chr8g0352621	MtAnn2	Putative annexin	7.66	Yes
72	MtrunA17_Chr2g0320061	MtPrx28	Putative peroxidase 28	7.49	Yes
72	MtrunA17_Chr7g0276531	N/A	Putative RNA-binding protein ARP1	7.1	No
72	MtrunA17_Chr8g0392521	MtRPP13-like	Putative disease resistance protein	6.25	Yes
72	MtrunA17_Chr5g0400461	N/A	Putative transcription factor NAM family	6.19	Yes
72	MtrunA17_Chr4g0006941	N/A	Putative non-specific serine/threonine protein kinase	6.01	Yes
72	MtrunA17_Chr1g0205731	N/A	Putative GTPase activating protein homolog 4	5.86	No
72	MtrunA17_Chr4g0042921	N/A	Putative transmembrane protein	5.81	Yes
24	MtrunA17_Chr0c27g0493921	MtCTSH	Putative Pro-cathepsin H	-6.85	Yes
24	MtrunA17_Chr3g0121991	MtUGT75L6	Putative crocetin glucosyltransferase	-5.76	No
48	MtrunA17_Chr8g0361011	N/A	Putative Ty3/gypsy retrotransposon protein	-5.01	Yes
24	MtrunA17_Chr4g0041901	MtPPR	Putative pentatricopeptide repeat-containing protein	-4.53	Yes
72	MtrunA17_Chr3g0081391	MtRPM1-like	Putative disease resistance protein	-4.24	Yes
48	MtrunA17_Chr1g0210081	N/A	Putative vacuolar protein sorting-associated protein Ist1	-3.43	Yes
48	MtrunA17_Chr4g0051271	N/A	Putative leucine-rich repeat domain superfamily	-3.31	Yes
24	MtrunA17_Chr7g0265101	N/A	Putative trans-zeatin O-beta-D-glucosyltransferase	-3.17	No
24	MtrunA17_Chr1g0196661	N/A	Putative glutathione transferase	-2.58	No
48	MtrunA17_Chr1g0188171	MtCML10	Putative Calmodulin-like 10	-2.43	No
