# Supplementary material for: Transcriptome analysis of resistant and susceptible M. truncatula genotypes in response to the necrotrophic fungus A. medicaginicola
Source: Research Square preprint supplement (doi:10.21203/rs.3.rs-4426199/v1), 2024-06-07
Supplement: Supplementary file 5 [file b8b99244b562a24224c7e71d.xlsx]

## Sheet: Sheet1
Table 7. Candidate genes for SBS disease resistance in M. truncatula HM078.
Gene ID (Mt5.0)	Gene	Rationale for selection	Potential role in defense	References
MtrunA17_Chr2g0327721	MtKCS12	Upregulated in resistant across multiple time points	VLCFAs contribute to physical barrier to pathogen	[43, 44]
MtrunA17_Chr8g0361341	RLK-Pelle-DLSV	Upregulated in resistant across multiple time points	Pathogen perception, activation of PR genes	[45, 46]
MtrunA17_Chr7g0272791	MtLOX1-5	Upregulated in resistant across multiple time points	JA biosynthesis, regulation of defense pathways	[41, 42]
MtrunA17_Chr5g0436941	RLK-Pelle-LRR	Highest upreguled RLK in resistant	Pathogen perception, activation of PR genes	[45, 46]
MtrunA17_Chr5g0404481	MtIFR	Upregulated in susceptible, constitutively expressed at higher levels in resistant	Isoflavonoid biosynthesis of anti-fungal phytoalexins	[51, 52]
MtrunA17_Chr1g0181091	MtPAL	Upregulated in susceptible, constitutively expressed at higher levels in resistant	Isoflavonoid biosynthesis of anti-fungal phytoalexins	[51, 52]
MtrunA17_Chr5g0443561	MtSTR10-like	Upregulated in resistant, downregulated in susceptible	Terpenoid biosynthesis of anti-fungal phytoalexins	[47, 48]
MtrunA17_Chr2g0323211	MtPBP1	Highly upregulated in enriched pathway in resistant	ROS signaling and defense pathway regulation	[35, 36]
MtrunA17_Chr4g0035371	MATH domain-containing protein	Highly upregulated in resistant	Regulates NLR turnover in A. thaliana	[39, 40]
MtrunA17_Chr2g0320061	MtPrx28	Highly upregulated and in enriched pathway in resistant	ROS response, DAMP elicited pathways	[37, 38]
MtrunA17_Chr8g0392521	RPP13-like	Highest upreguled NLR in resistant	NLR gene confers resistance	[18, 76]
MtrunA17_Chr4g0009001	TIR-NBS-LRR	Contrasting expression profile in QTL rnpm1	NLR acting as susceptibility factor	[9, 16]
MtrunA17_Chr4g0009011	TIR-NBS-LRR	Contrasting expression profile in QTL rnpm1	NLR acting as susceptibility factor	[9, 16]
MtrunA17_Chr4g0064871	PAM16-like	Contrasting expression profile in QTL rnpm2	PAM16 as negative regulator of plant immunity	[74, 75]
MtrunA17_Chr7g0263131	MtZAT11	Upregulated in both genotypes, higher upregulation in resistant	Regulator of hormone pathways in response to biotic stress	[49, 50]
MtrunA17_Chr5g0417371	MtRNASET2	Upregulated in enriched pathway in resistant	Inhibits pathogen colonization	[57, 58]
MtrunA17_Chr3g0122031	MtXET	Upregulated in enriched pathway in resistant	Cell wall strengthening	[59–61]
MtrunA17_Chr2g0330291	MtBGAL8	Upregulated in enriched pathway in resistant	Cell wall modification	[62, 63]
MtrunA17_Chr5g0402831	MtAAO	Upregulated in enriched pathway in resistant	ROS production and defense signaling	[64, 65]
