# Supplementary material for: Transcriptome analysis of resistant and susceptible M. truncatula genotypes in response to the necrotrophic fungus A. medicaginicola
Source: Research Square preprint supplement (doi:10.21203/rs.3.rs-4426199/v1), 2024-06-07
Supplement: Supplementary file 6 [file b9ae4458779cab0df45c20b1.xlsx]

## Sheet: Sheet1
Table 2. DEGs in the resistant genotype across multiple time points.
Time point (hpi)	Gene ID	Gene abbreviation	Function	log2FC	Unique to HM078
48, 72	MtrunA17_Chr1g0210081	N/A	Putative vacuolar protein sorting-associated protein Ist1	-3.43, 3.04	Yes
48, 72	MtrunA17_Chr2g0299761	N/A	Putative nuclease HARBI1	-1.55, 1.68	Yes
48, 72	MtrunA17_Chr2g0327721	MtKCS12	Putative very-long-chain 3-oxoacyl-CoA synthase	3.32, 2.48	Yes
48, 72	MtrunA17_Chr4g0050141	N/A	Putative classical arabinogalactan protein	-1.98, 2.42	No
24, 48, 72	MtrunA17_Chr7g0272791	MtLOX1-5	Putative linoleate 9S-lipoxygenase	1.72, 1.19, 1.09	Yes
48, 72	MtrunA17_Chr8g0345211	N/A	Putative pectinesterase	-1.29, 1.52	Yes
48, 72	MtrunA17_Chr8g0361341	N/A	Putative protein kinase RLK-Pelle-DLSV family	3.63, 3.23	Yes
