# Supplementary material for: Transcriptome analysis of resistant and susceptible M. truncatula genotypes in response to the necrotrophic fungus A. medicaginicola
Source: Research Square preprint supplement (doi:10.21203/rs.3.rs-4426199/v1), 2024-06-07
Supplement: Supplementary file 7 [file f03b14be5a30585cba2eb62e.xlsx]

## Sheet: Sheet1
Table 3. The ten most upregulated and downregulated DEGs in susceptible genotype A17.
Time point (hpi)	Gene ID	Gene abbreviation	Function	log2FC	Unique DEG in A17
72	MtrunA17_Chr1g0200151	N/A	putative protein	10.97	Yes
72	MtrunA17_Chr4g0024181	MtMYB	Putative transcription factor MYB-HB-like family	10.81	Yes
72	MtrunA17_Chr5g0400961	N/A	Putative VQ motif-containing protein	10.72	Yes
72	MtrunA17_Chr7g0266071	MtLYE1	LysM domain containing protein	10.55	Yes
72	MtrunA17_Chr3g0121541	MtCHS-1A	Chalcone synthase 1A	10.34	Yes
72	MtrunA17_Chr5g0414361	N/A	putative protein	10.31	Yes
72	MtrunA17_Chr7g0218261	N/A	Putative methyltransferase	10.26	Yes
72	MtrunA17_Chr4g0051421	N/A	Putative tetrahydroberberine oxidase	10.21	Yes
72	MtrunA17_Chr4g0048041	N/A	Putative NADH:ubiquinone reductase (non-electrogenic)	10.05	Yes
72	MtrunA17_Chr7g0218841	N/A	Putative UDP-glucuronosyl/UDP-glucosyltransferase	10.04	Yes
72	MtrunA17_Chr3g0111301	N/A	hypothetical protein	-6.26	Yes
72	MtrunA17_Chr6g0467861	N/A	Putative shikimate O-hydroxycinnamoyltransferase	-6.43	Yes
72	MtrunA17_Chr3g0108631	N/A	Putative NAD(P)H-quinone oxidoreductase, subunit N	-6.43	Yes
72	MtrunA17_Chr5g0444611	N/A	putative protein	-6.49	Yes
72	MtrunA17_Chr4g0026681	N/A	putative protein	-6.5	Yes
72	MtrunA17_Chr8g0354041	MtEIX2-like	Putative non-specific serine/threonine protein kinase	-6.58	Yes
72	MtrunA17_Chr3g0142421	N/A	Putative small auxin-up RNA	-6.86	Yes
72	MtrunA17_Chr3g0124411	N/A	Putative heavy metal binding protein HIPP/ATX1	-6.87	Yes
72	MtrunA17_Chr6g0486091	N/A	Putative adenosylhomocysteine nucleosidase	-7	Yes
72	MtrunA17_Chr3g0143461	N/A	Putative MFS transporter superfamily	-7.43	Yes
